# Supplementary material for: P/S ligands derived from carbohydrates in Rh-catalyzed hydrosilylation of ketones
Source: Royal Society of Chemistry journal article supplement (doi:10.1039/c1ob06305g), 2011-09-28
Supplement: c1ob06305g.pdf [file c1ob06305g.pdf]

**Electronic Supporting Information of the Manuscript:**

“P/S ligands Derived from Carbohydrates in Rh-Catalyzed Hydrosilylation of Ketones”.

By: Nouredine Khier.\*<sup>a</sup> Manuel Pernía Leal,<sup>a</sup> Raquel Navas,<sup>a</sup> Juan Francisco Moya,<sup>a</sup>  
María Victoria García Pérez,<sup>b</sup> Inmaculada Fernández.\*<sup>b</sup>

*Contribution from: the Instituto de Investigaciones Químicas, C.S.I.C-Universidad de Sevilla, c/. Américo Vespucio, 49., Isla de la Cartuja, 41092 Sevilla, Spain, and the Departamento de Química Orgánica y Farmacéutica, Facultad de Farmacia, Universidad de Sevilla, 41012 Sevilla, Spain.*

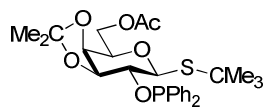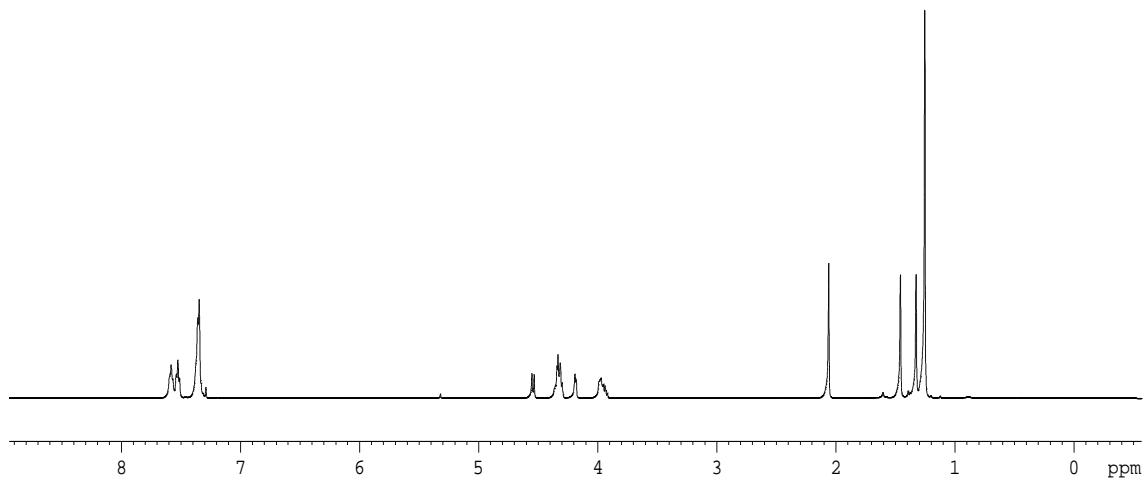

**<sup>1</sup>H NMR of compound 1**

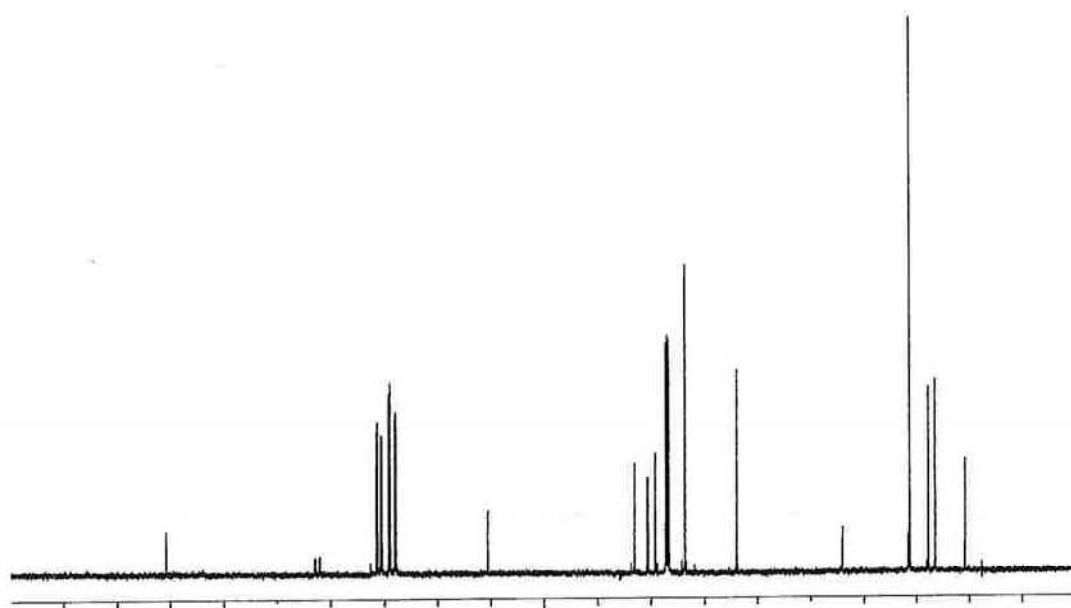

**<sup>13</sup>C NMR of compound 1**

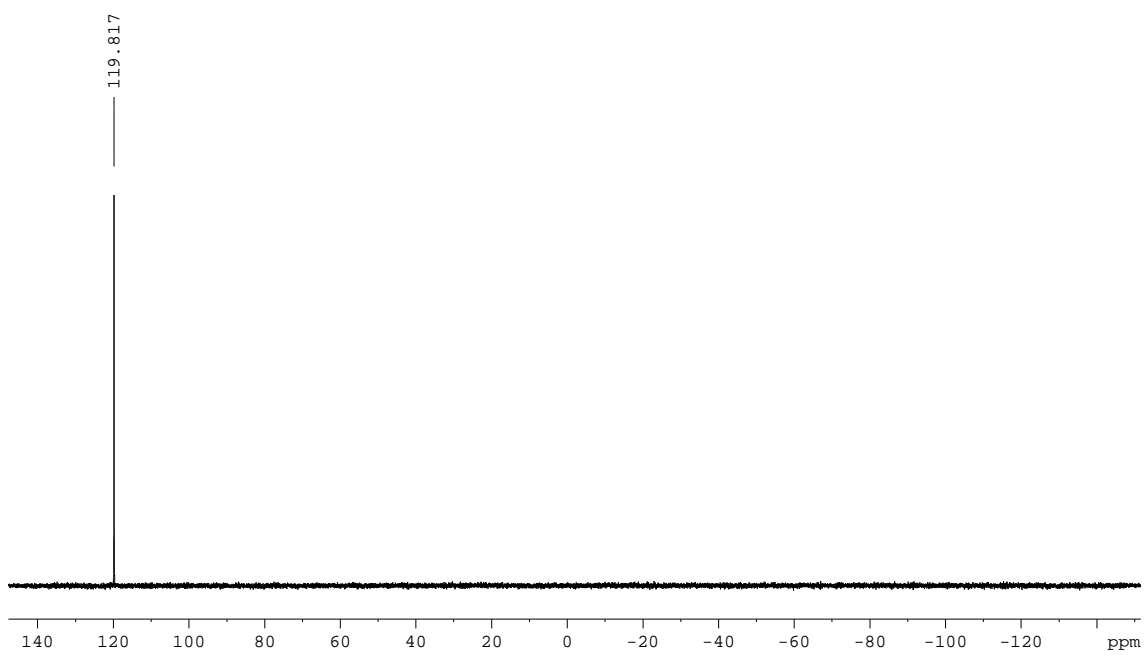

$^{31}\text{P}$  NMR of compound 1

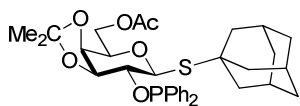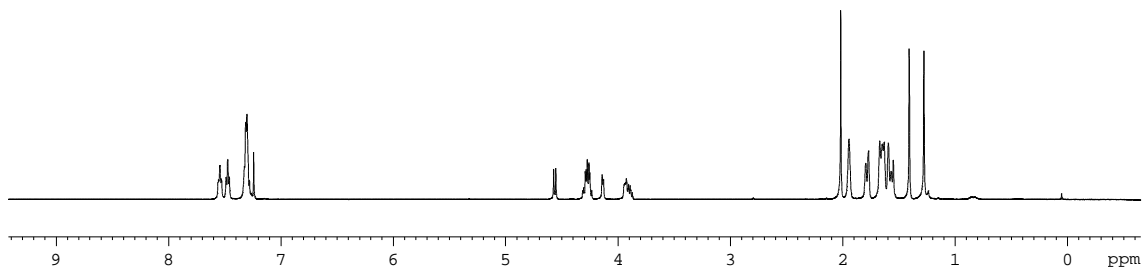

**<sup>1</sup>H NMR of compound 2**

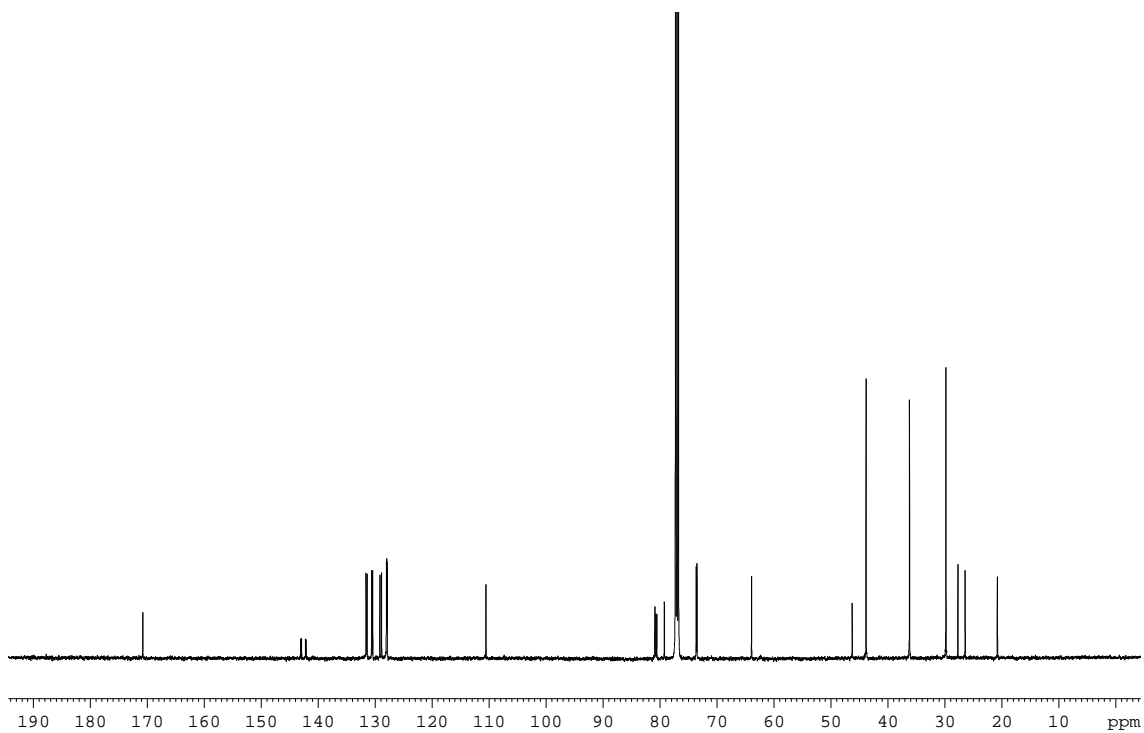

**<sup>13</sup>C NMR of compound 2**

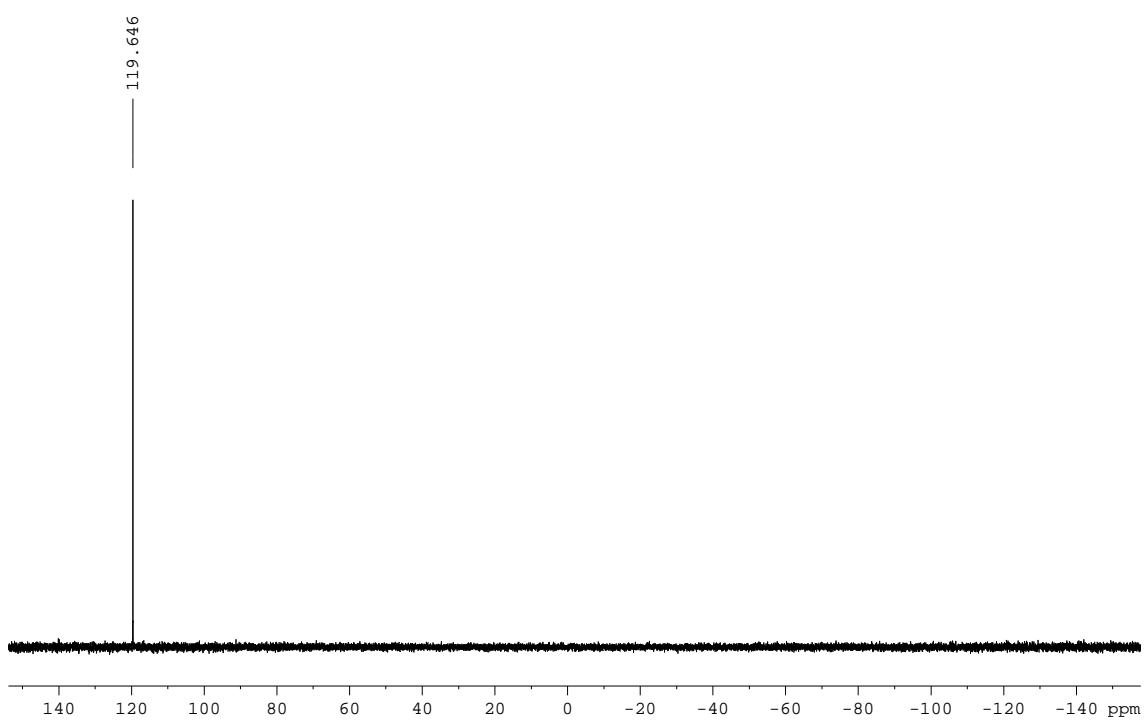

$^{31}\text{P}$  NMR of compound 2

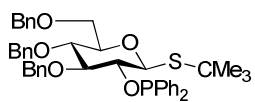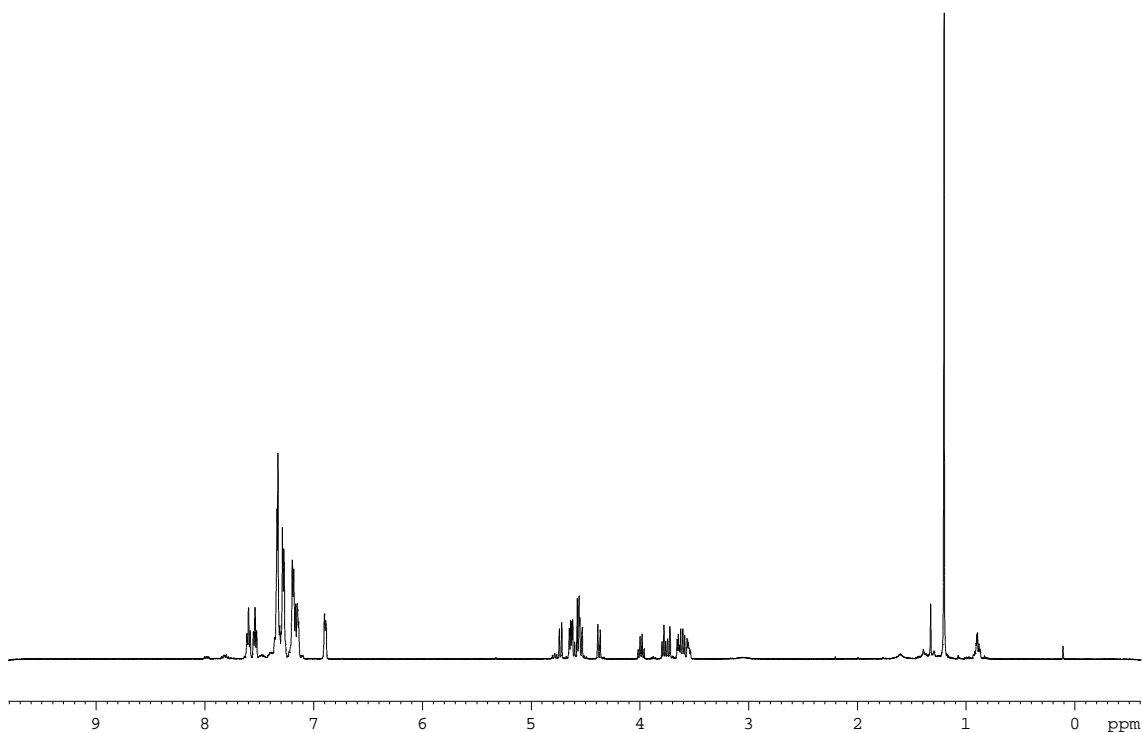

**<sup>1</sup>H NMR of compound 3**

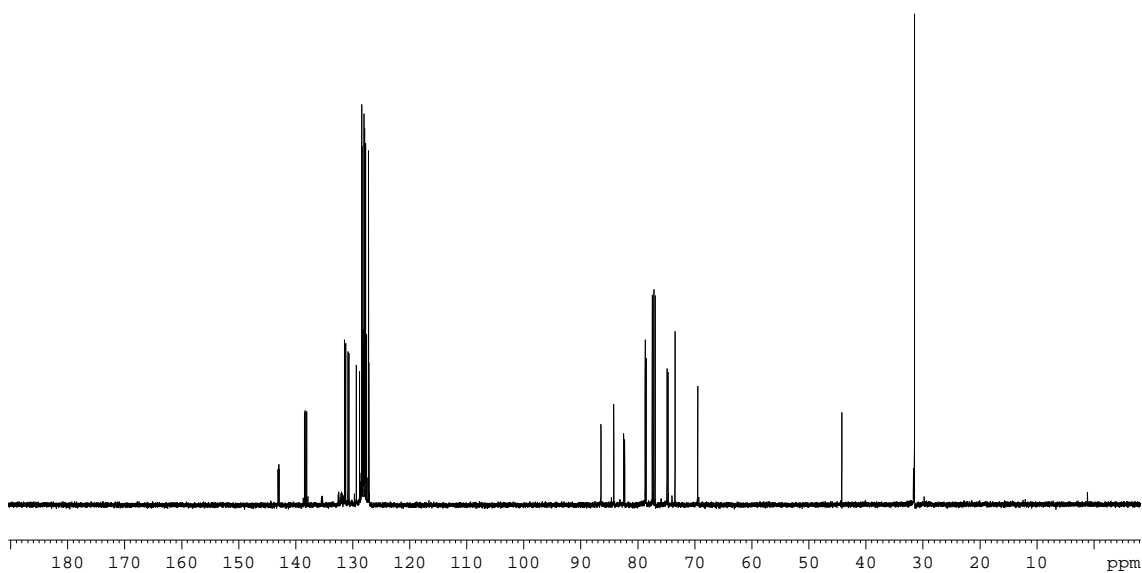

**<sup>13</sup>C NMR of compound 3**

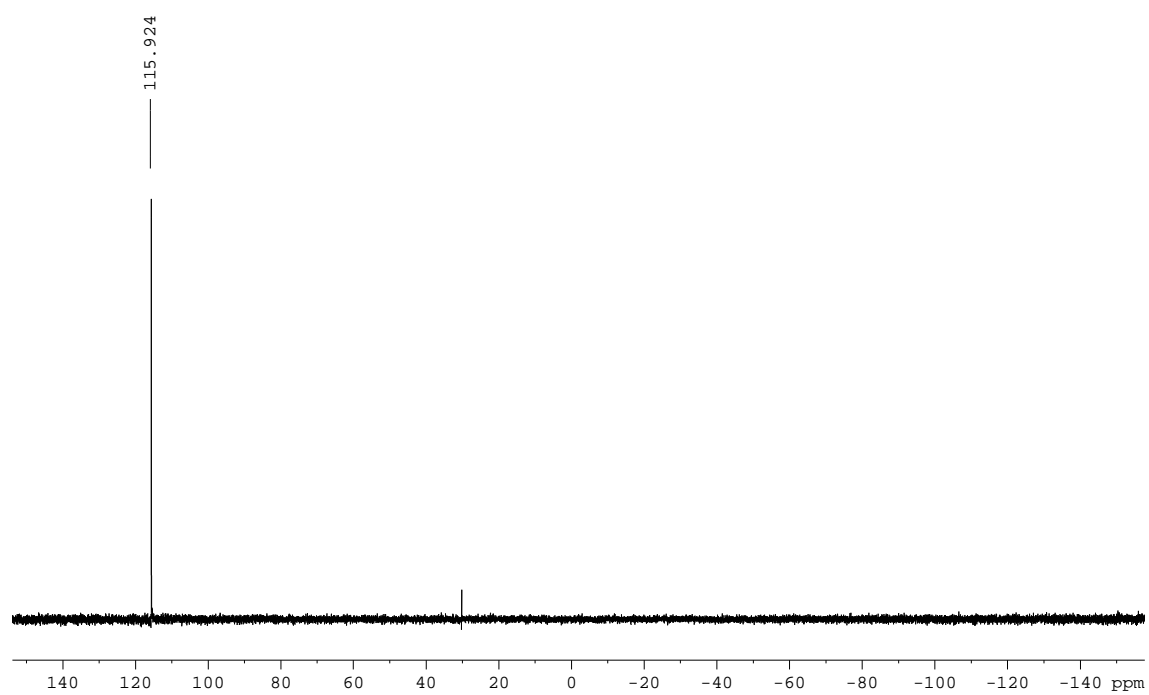

$^{31}\text{P}$  NMR

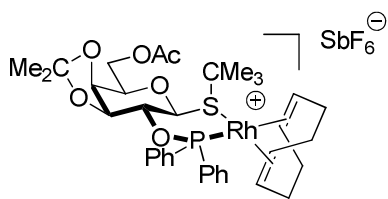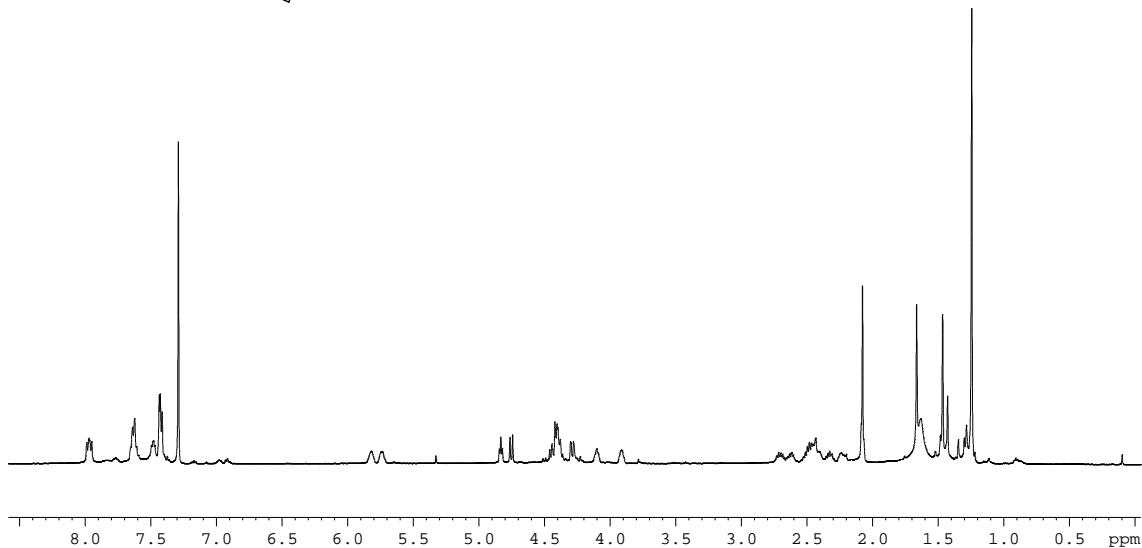

**<sup>1</sup>H NMR of compound 4**

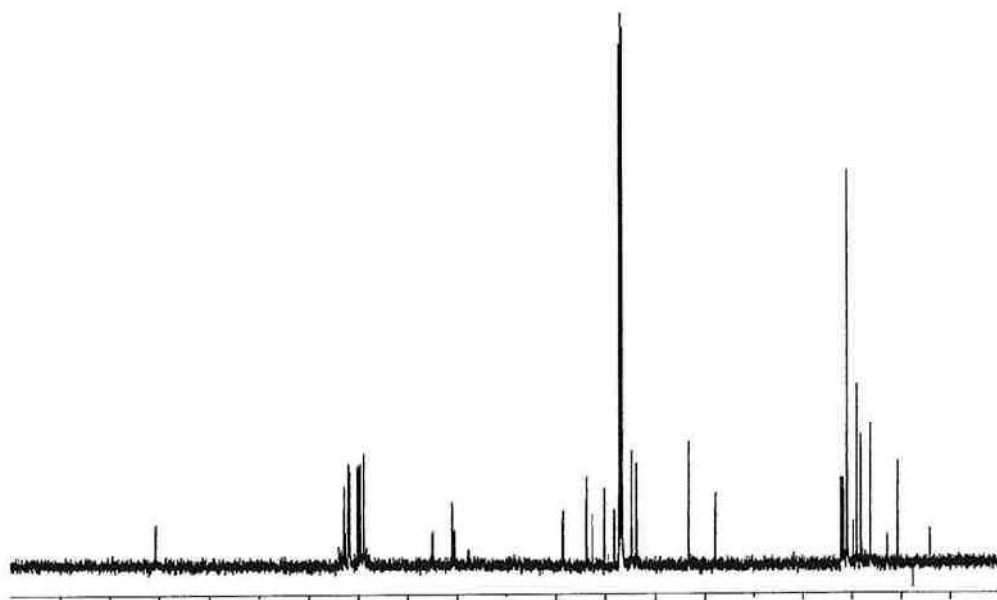

**<sup>13</sup>C NMR of compound 4**



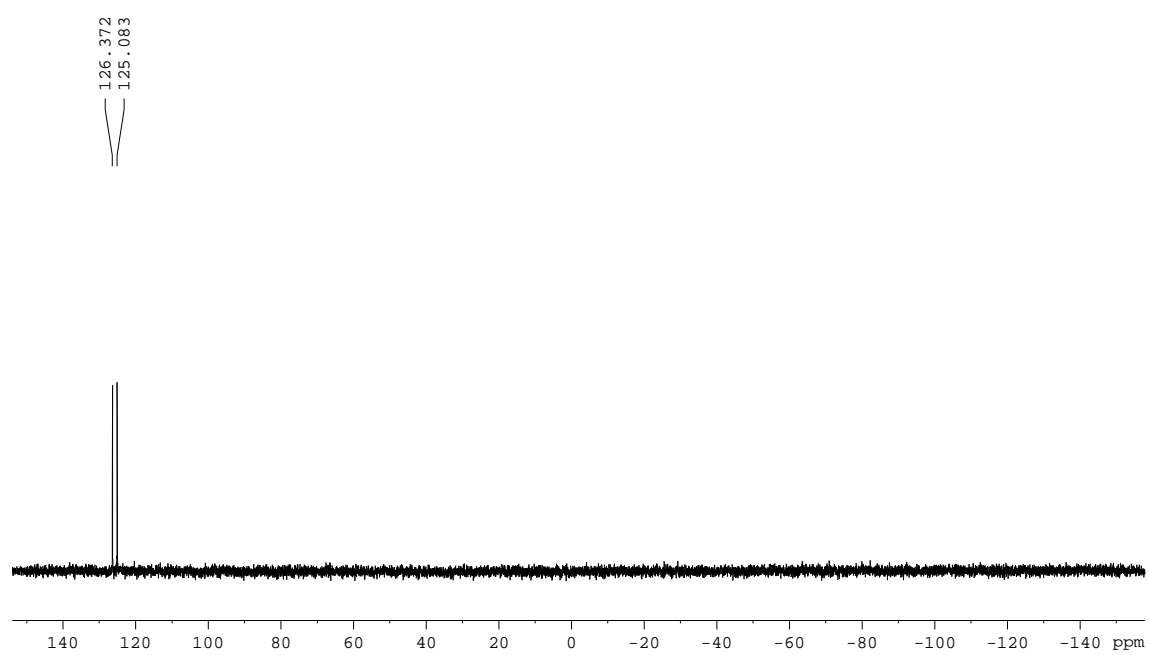

$^{31}\text{P}$  NMR of compound 4

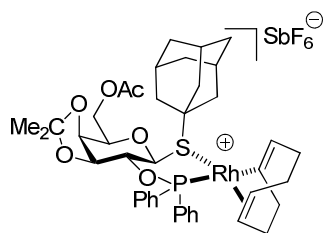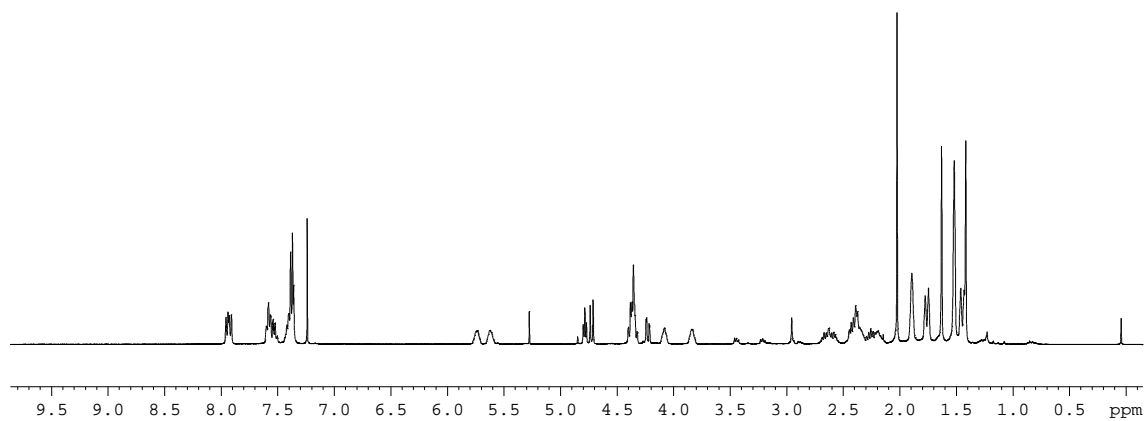

**<sup>1</sup>H NMR of compound 5**

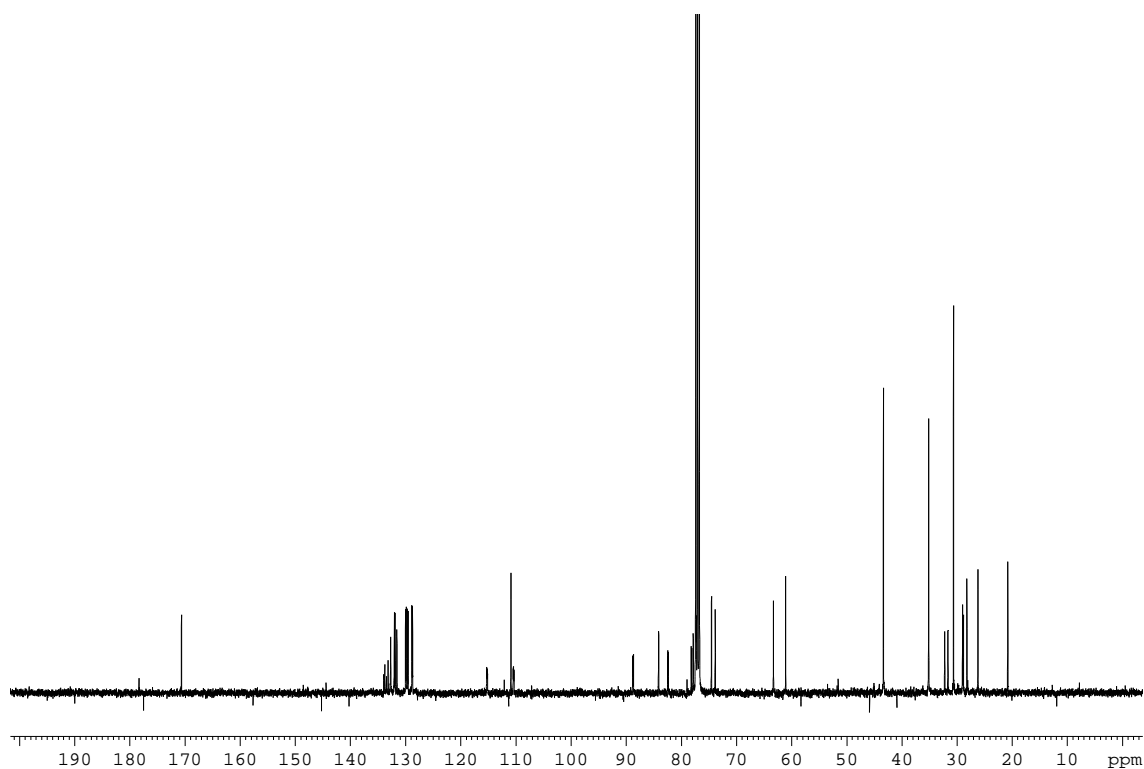

**<sup>13</sup>C NMR of compound 5**

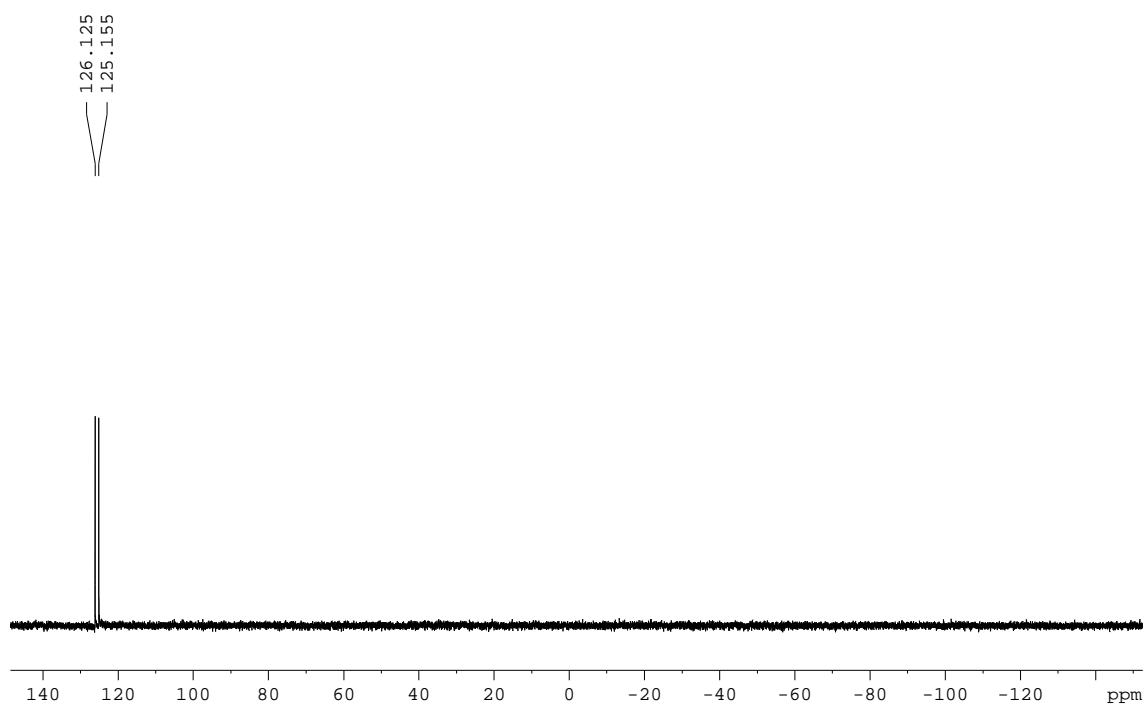

$^{31}\text{P}$  NMR of compound 5

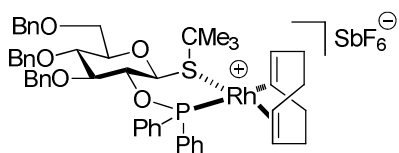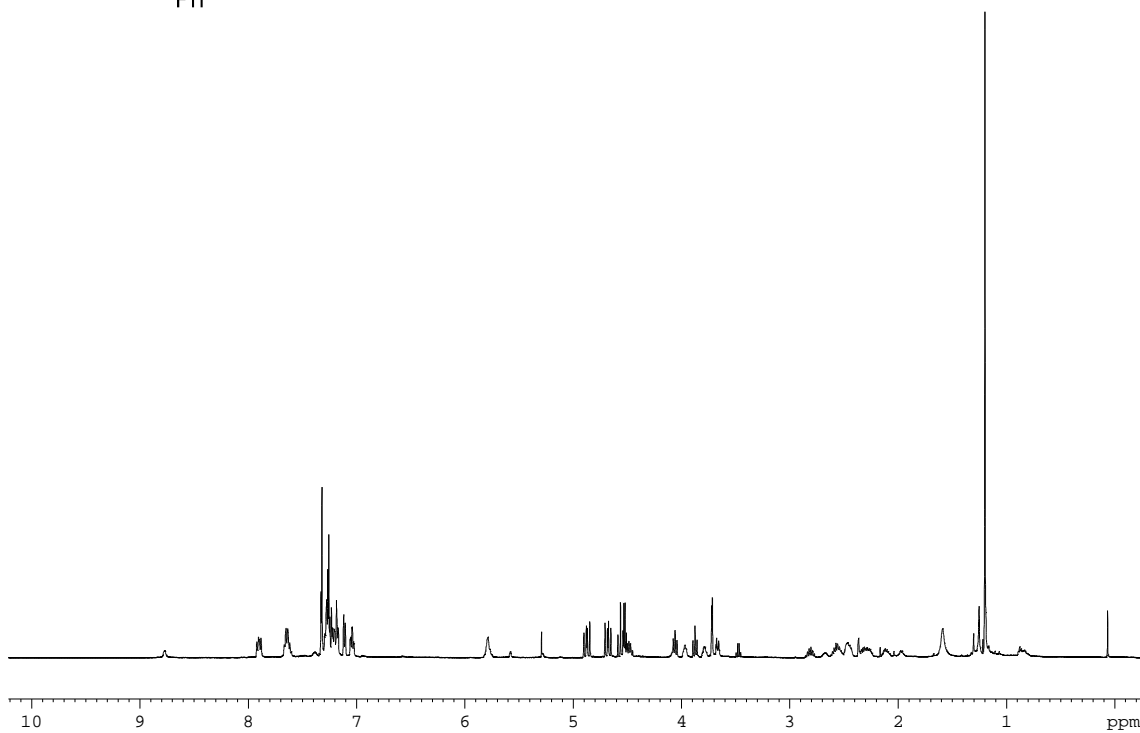

**<sup>1</sup>H NMR of compound 6**

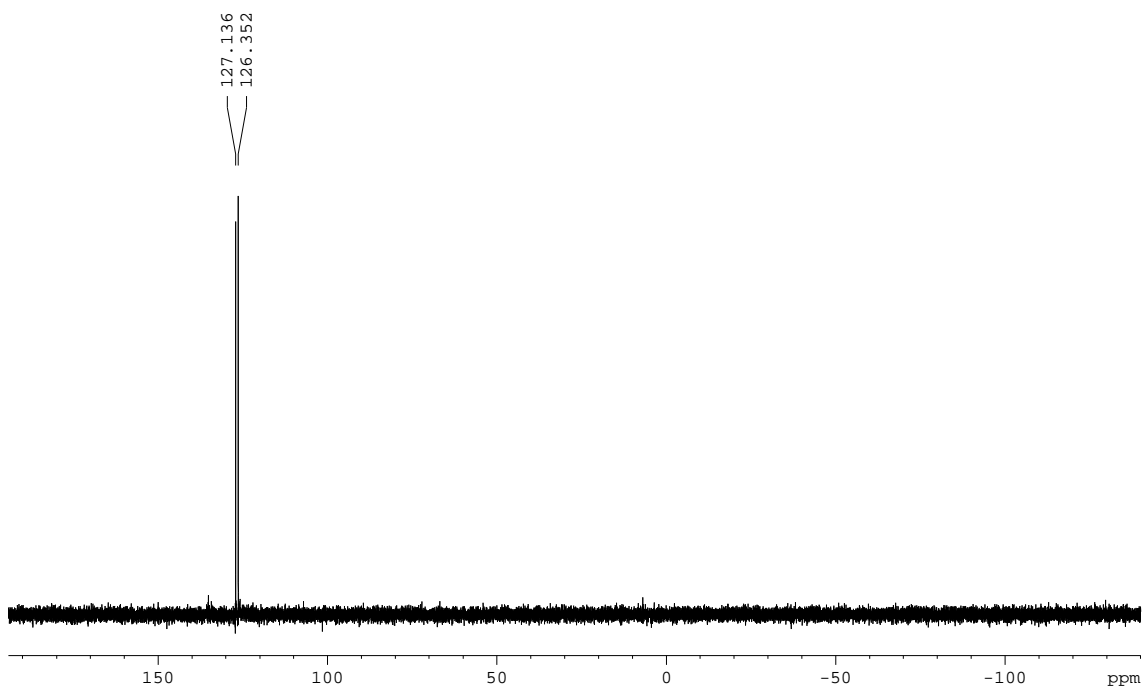

**<sup>31</sup>P NMR of compound 6**

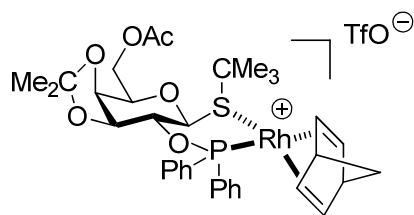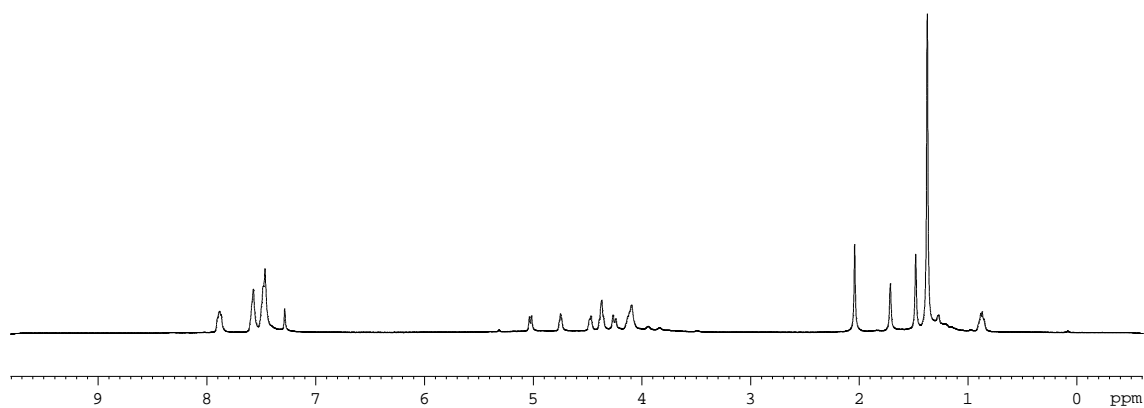

**<sup>1</sup>H NMR of compound 9**

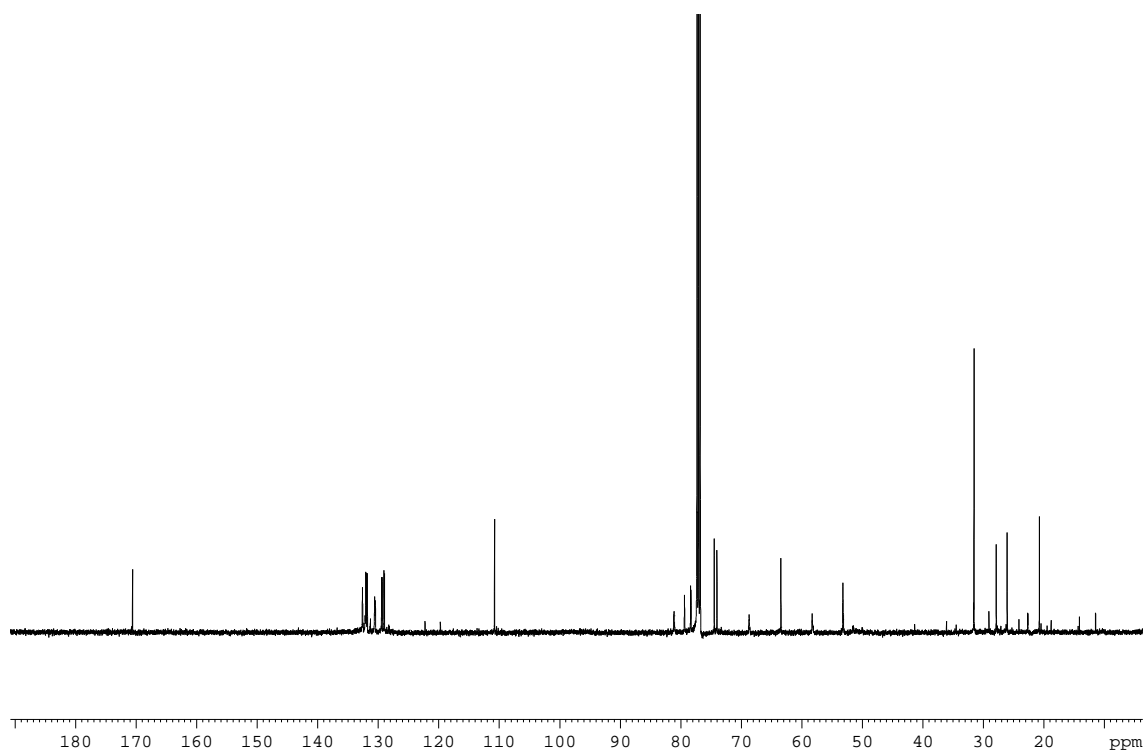

**<sup>13</sup>C NMR of compound 9**

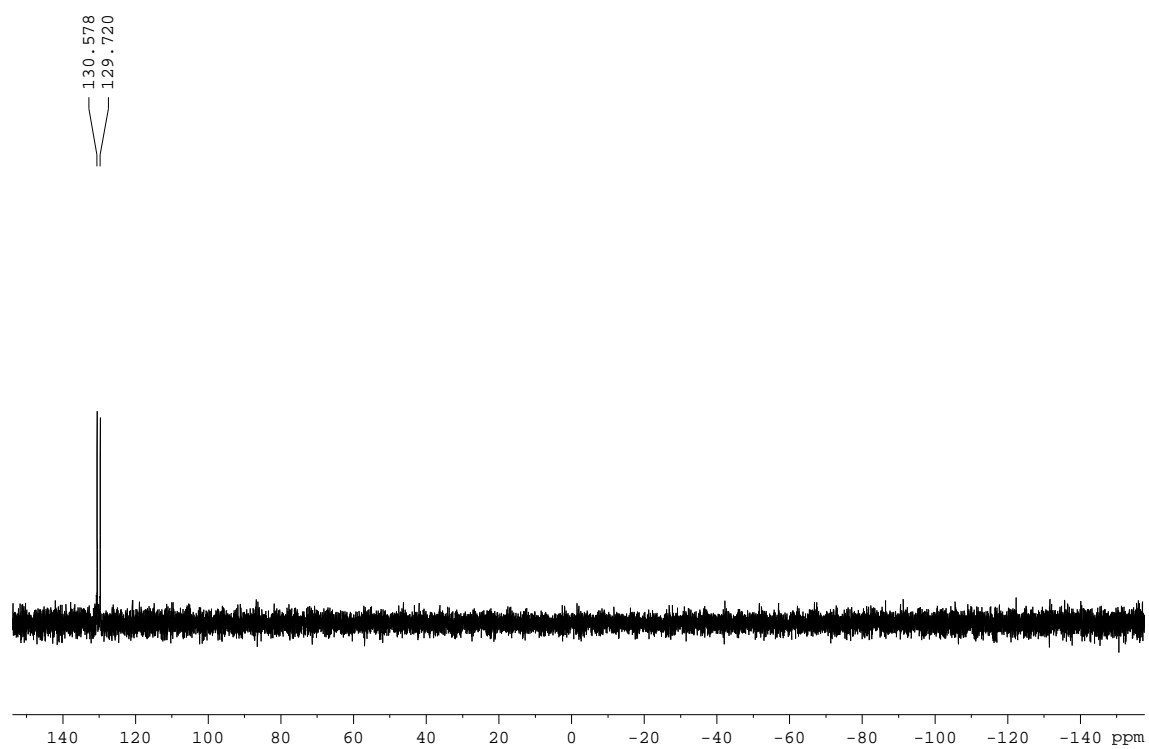

$^{31}\text{P}$  NMR of compound 9

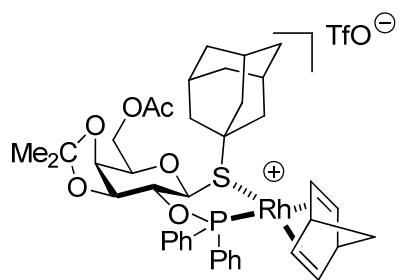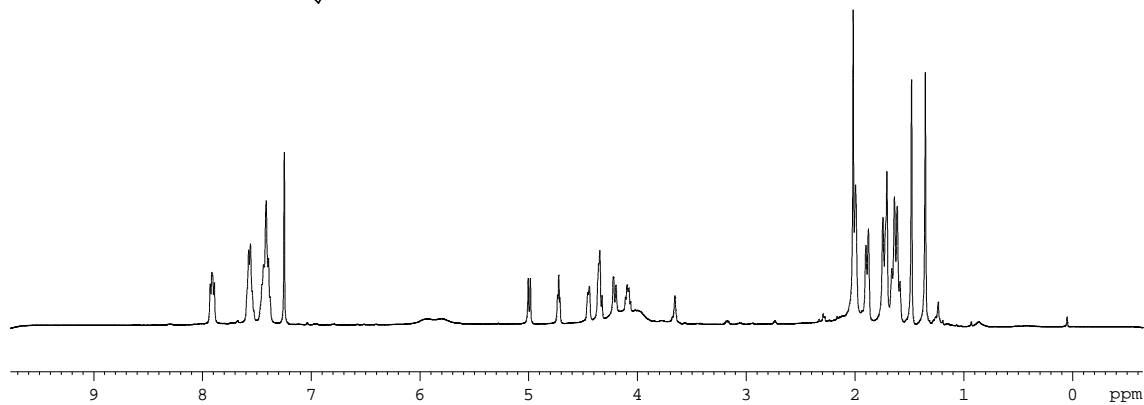

**<sup>1</sup>H NMR of compound 10**

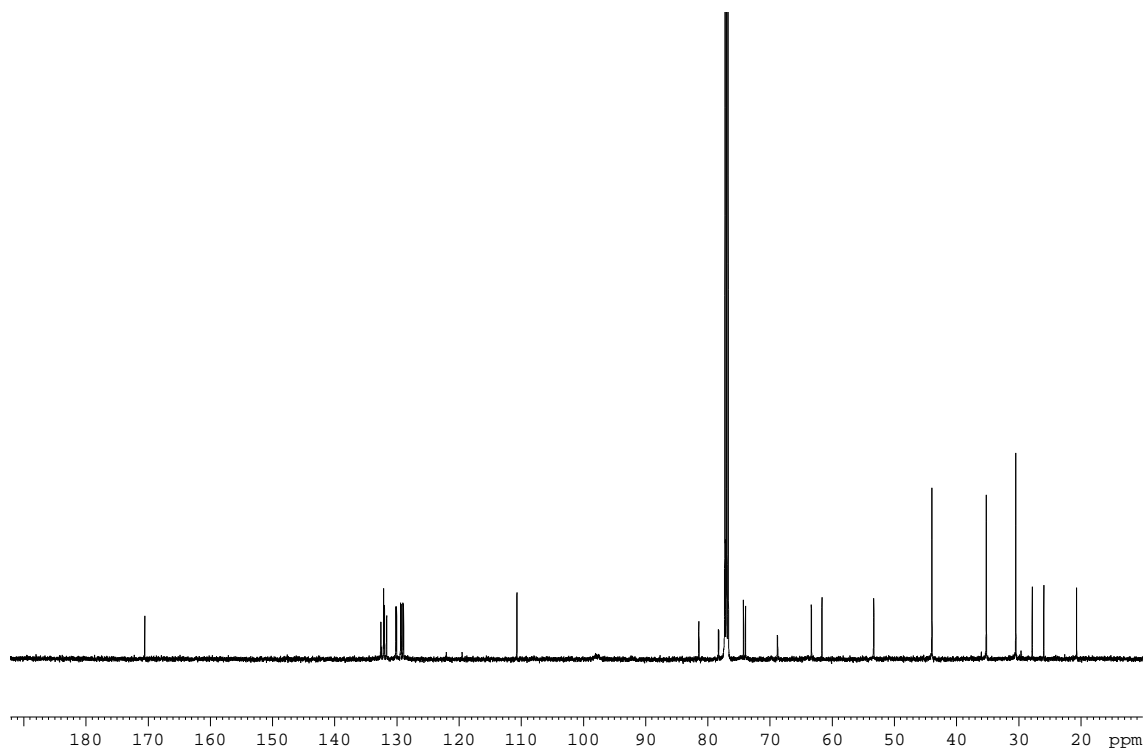

**<sup>13</sup>C NMR of compound 10**

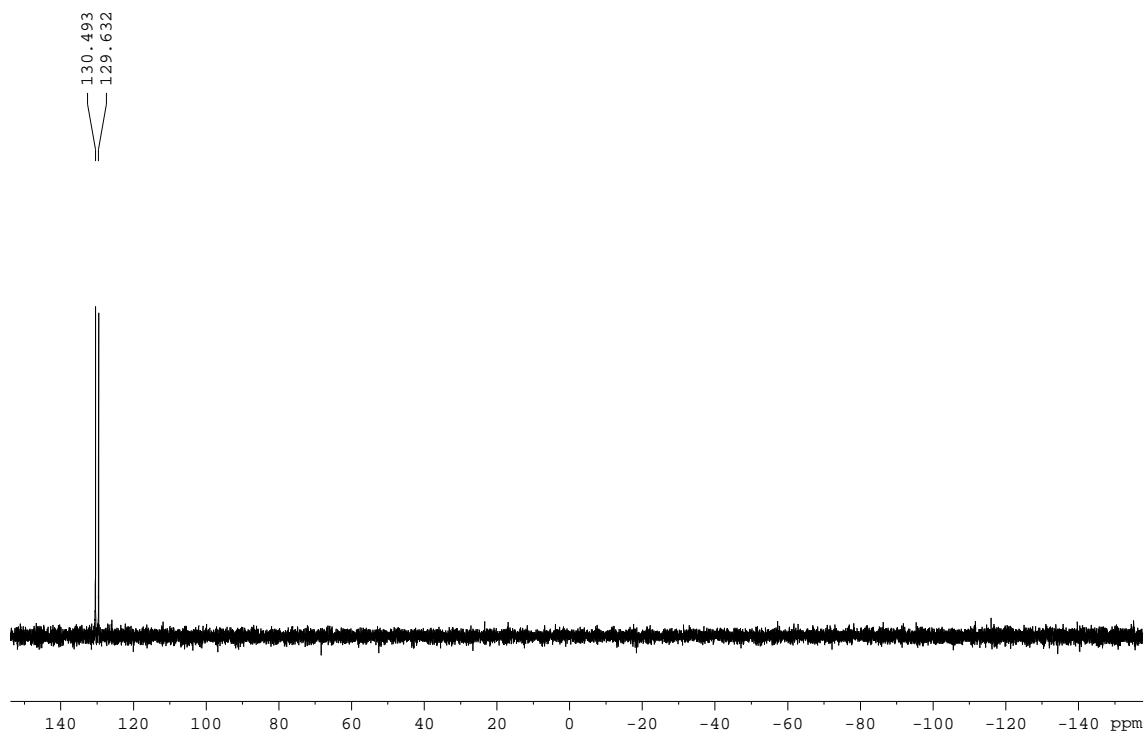

$^{31}\text{P}$  NMR of compound 10



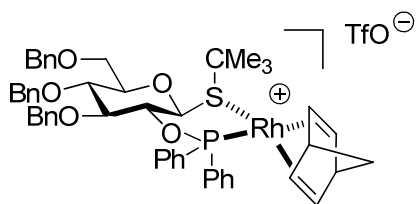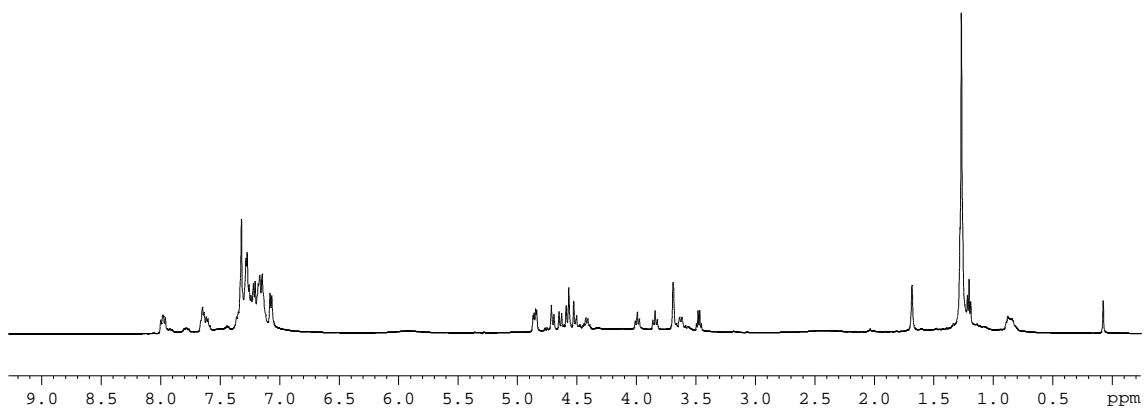

**<sup>1</sup>H NMR of compound 11**

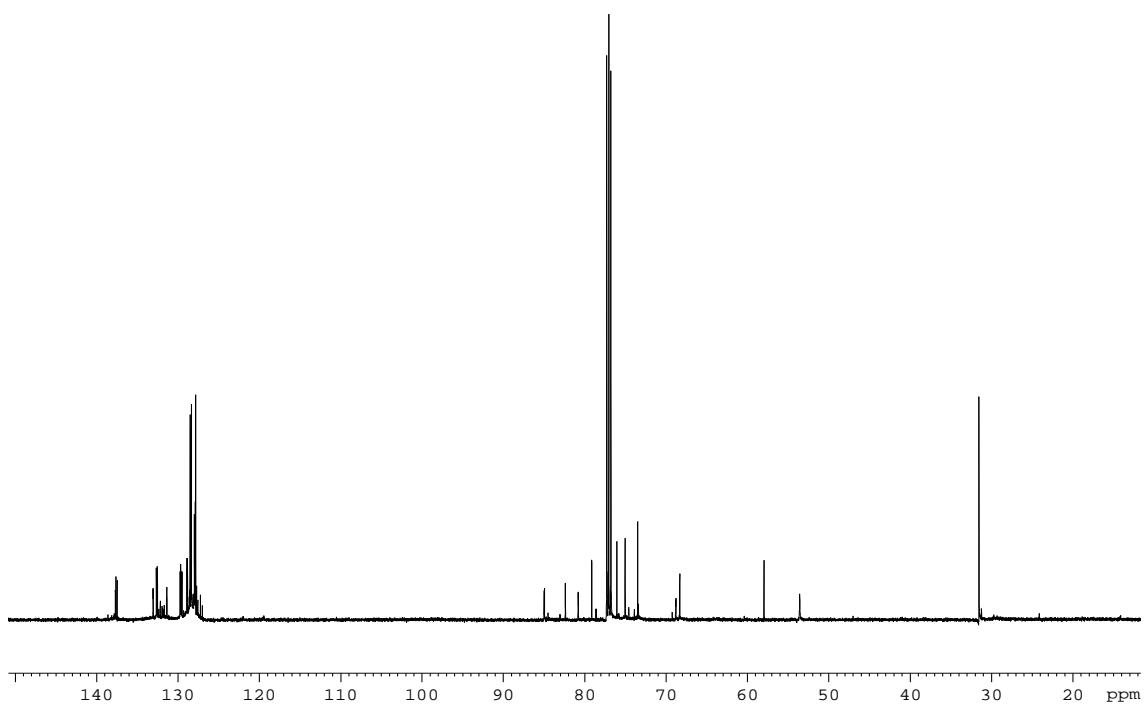

**<sup>13</sup>C NMR of compound 11**

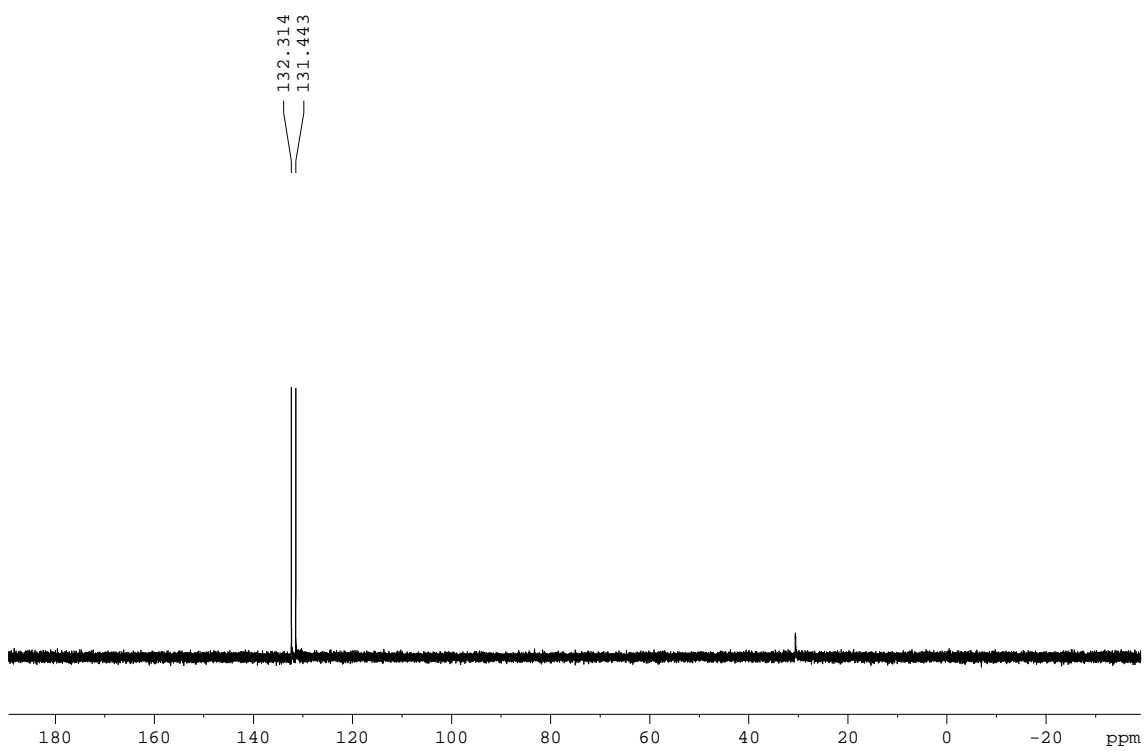

$^{31}\text{P}$  NMR of compound 11
